# Supplementary material for: High current density electrodeposition from silver complex ionic liquids
Source: Royal Society of Chemistry journal article supplement (doi:10.1039/c2cp22987k), 2011-12-23
Supplement: c2cp22987k.pdf [file c2cp22987k.pdf]

# High current density electrodeposition from silver complex ionic liquids - Electronic Supplementary Information

Stijn Schaltin,<sup>a</sup> Neil R. Brooks,<sup>b</sup> Linda Stappers,<sup>a</sup> Kristof Van Hecke,<sup>b</sup> Luc Van Meervelt,<sup>b</sup>  
Koen Binnemans,<sup>b</sup> and Jan Fransaer<sup>\*a</sup>

<sup>a</sup>*Katholieke Universiteit Leuven, Department of Metallurgy and Materials Engineering,  
Kasteelpark Arenberg 44 - bus 2450, B-3001 Leuven, Belgium. Fax: +32 16 32 19 91; Tel:  
+32 16 32 12 60; E-mail: Jan.Fransaer@mtm.kuleuven.be*

<sup>b</sup>*Katholieke Universiteit Leuven, Department of Chemistry, Celestijnenlaan 200F - bus 2404,  
B-3001 Leuven (Belgium)*

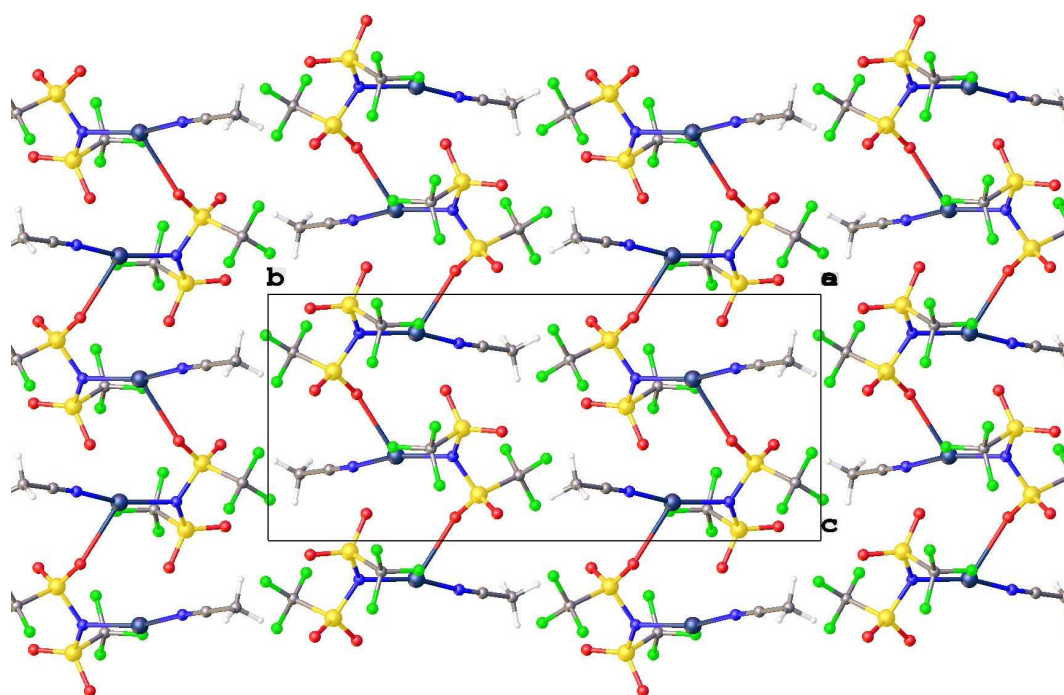

Figure 1: View of the packing in the crystal structure of [Ag(MeCN)][Tf<sub>2</sub>N], viewed along the crystallographic *a* axis.

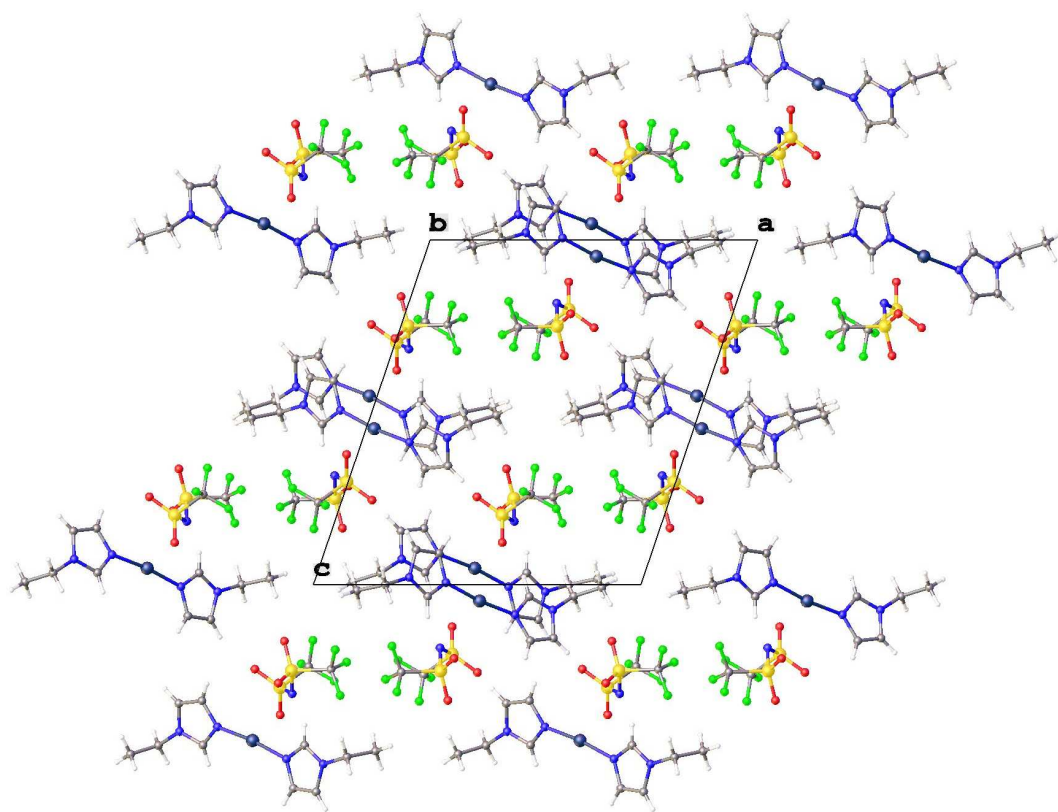

Figure 2: View of the packing in the crystal structure of  $[\text{Ag}(\text{EtIm})_2][\text{Tf}_2\text{N}]$ , viewed along the crystallographic  $b$  axis.

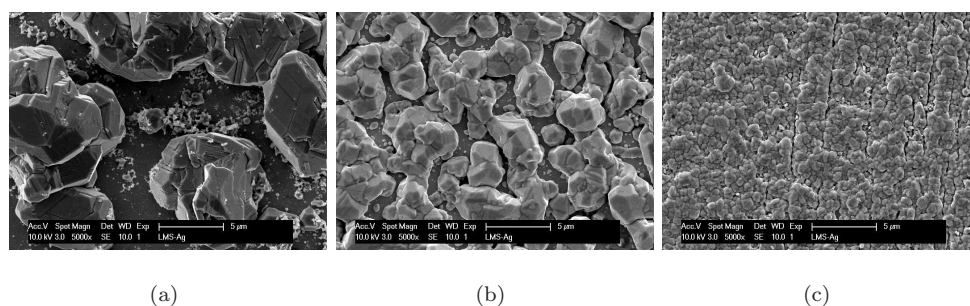

Figure 3: Silver deposits from  $[\text{Ag}(\text{MeCN})_4]_2[\text{Ag}(\text{Tf}_2\text{N})_3]$ , saturated with water, on a Au working electrode at 50 °C for different current densities: (a)  $1 \text{ A dm}^{-2}$ , (b)  $5 \text{ A dm}^{-2}$ , and (c)  $25 \text{ A dm}^{-2}$ . The theoretical thickness is  $1 \mu\text{m}$ .

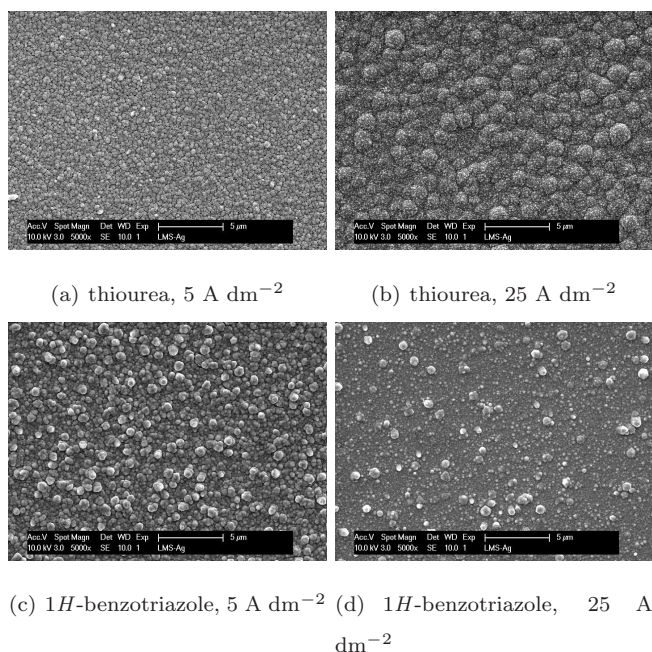

Figure 4: Silver deposits from [Ag(MeCN)<sub>4</sub>]<sub>2</sub>[Ag(Tf<sub>2</sub>N)<sub>3</sub>] on a Au working electrode at 50 °C for 5 A dm<sup>-2</sup> and 25 A dm<sup>-2</sup> with 0.05 mol dm<sup>-3</sup> of the mentioned additive. The theoretical thickness is 1 μm.

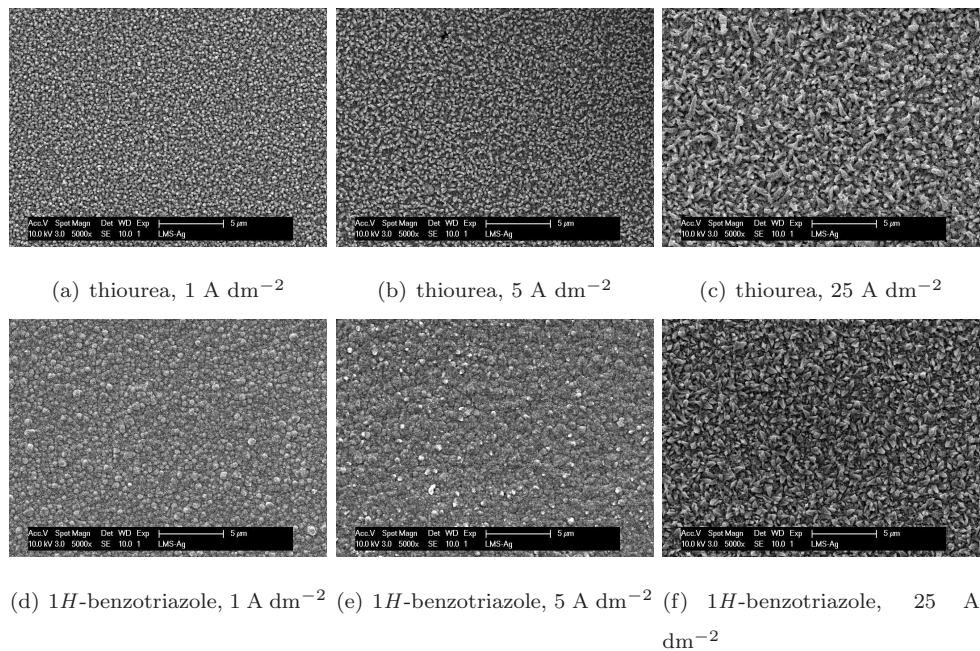

Figure 5: Silver deposits from [Ag(EtIm)<sub>2</sub>][Tf<sub>2</sub>N] on a Au working electrode at 90 °C for 1 A dm<sup>-2</sup>, 5 A dm<sup>-2</sup> and 25 A dm<sup>-2</sup> with 0.05 mol dm<sup>-3</sup> of the mentioned additive. The theoretical thickness is 1 μm.

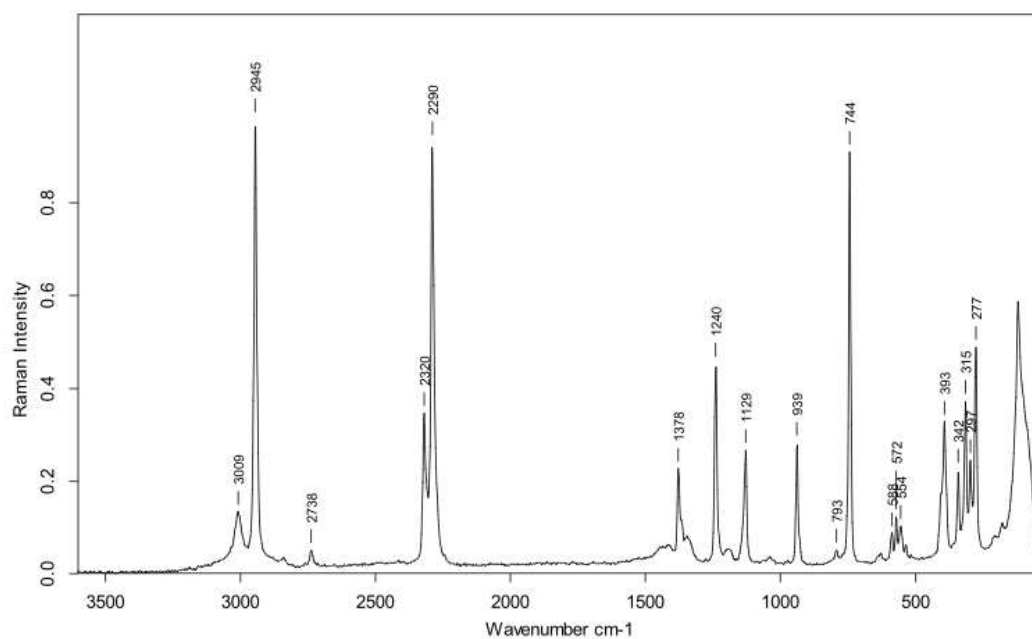

Figure 6: Raman spectrum of solid  $[\text{Ag}(\text{MeCN})_4]_2[\text{Ag}(\text{Tf}_2\text{N})_3]$ .

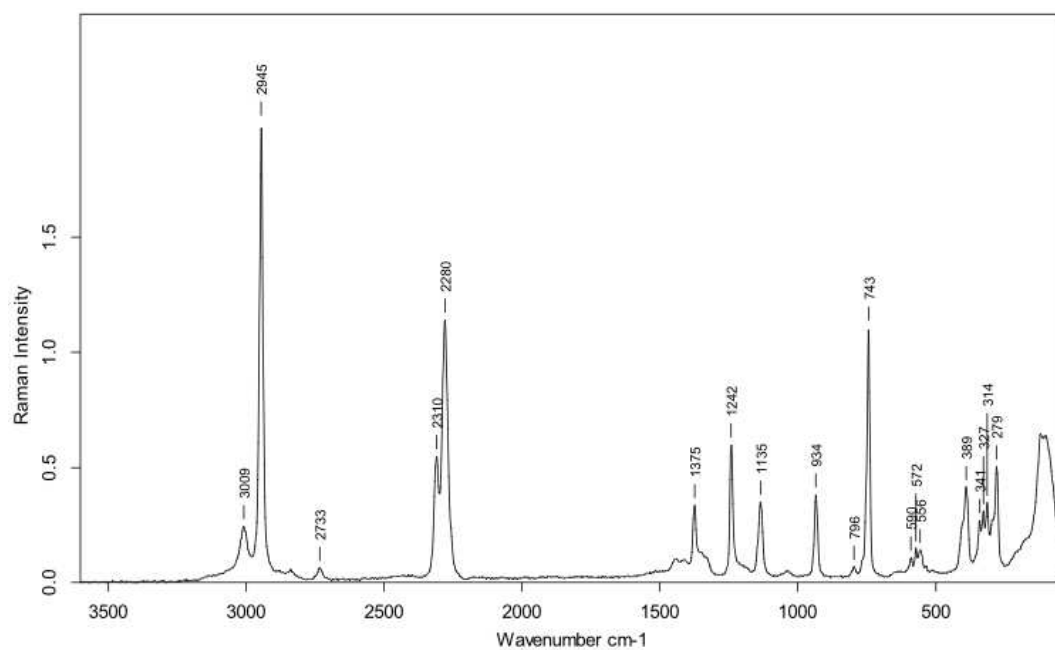

Figure 7: Raman spectrum of liquid  $[\text{Ag}(\text{MeCN})_4]_2[\text{Ag}(\text{Tf}_2\text{N})_3]$ .
